# Supplementary material for: Interpretable, not black-box, artificial intelligence should be used for embryo selection
Source: Oxford University Press journal article supplement (doi:10.1093/hropen/hoab040), 2021-09-01
Supplement: hoab040_supplementary_data.docx [file hoab040_supplementary_data.docx]

**Supplementary Data**

Search strategy for full-text studies evaluating artificial intelligence (AI) to select embryos, in MEDLINE and Embase:

- MEDLINE: (exp Artificial Intelligence/ OR Artificial intelligence* OR AI OR exp Neural Networks, Computer/ OR Deep learning OR Neural network* OR machine learning OR support vector machine OR automatic classification) AND (exp Fertilization in Vitro/ OR IVF OR in vitro fertilization OR embryo*).
- Embase: (exp artificial intelligence/ OR artificial intelligence* OR AI OR exp machine learning/ or machine learning* OR exp artificial neural network/ OR neural network* OR deep learning* OR exp Deep Learning/ OR exp support vector machine/ OR support vector machine* OR automatic classification) AND (exp fertilization in vitro/ OR ivf OR embryo* OR in vitro fertilization OR exp in vitro fertilization/).
